# Supplementary material for: Autoantigen-Induced Focusing of Vβ13+ T Cells Precedes Onset of Autoimmune Diabetes in the LEW.1WR1 Rat
Source: PubMed Central journal article supplement — Diabetes. 2014 Jan 16;63(2):596–604. doi: 10.2337/db13-0462 (PMC3900547; doi:10.2337/db13-0462), 2014-01-16

SUPPLEMENTARY DATA

**Supplementary Table 1.** List of primers used for qRT-PCR transcript analysis and for cloning of V $\alpha$ 5 and V $\beta$ 13 CDR3 sequences.

| <b>Primers for qRT-PCR</b>                                         |                            |
|--------------------------------------------------------------------|----------------------------|
| TCR-V $\beta$ 13-Fwd                                               | TCGACACAGTTCTGTCTGAAAC     |
| TCR-V $\beta$ 13-Rev                                               | TGTCCAGAAACAGGGTCACA       |
| TCR-C $\beta$ -Fwd                                                 | GGTCAGAGGACTCACCCAAA       |
| TCR-C $\beta$ -Rev                                                 | AGCACAGCATAACAGGGTGG       |
| GAPDH-Fwd                                                          | GCACCACCAACTGCTTAGCC       |
| GAPDH-Rev                                                          | CTGAGTGGCAGTGATGGCAT       |
| Insulin-Fwd                                                        | CAAACAGCACCTTTGTGGT        |
| Insulin-Rev                                                        | CCAGTTGGTAGAGGGAGCAG       |
| <b>Primers for TCR transcript cloning</b>                          |                            |
| TCR-V $\beta$ 13                                                   | TCGACACAGTTCTGTCTGAAAC     |
| TCR-C $\beta$ -Rev                                                 | GCTTCTGATGGCTCAAACAAGG     |
| TCR-V $\alpha$ 5 Fwd (1)                                           | ATGAGCCAAGGTGAGCAAGT       |
| TCR-V $\alpha$ 5 Fwd (2)                                           | CAGCTTCCTTCCATCCTGAG       |
| TCR-C $\alpha$ Rev                                                 | GCTCTGGGACACATTGGTTT       |
| <b>Primers for TCR-V<math>\alpha</math>5 confirmation analysis</b> |                            |
| TCR-V $\alpha$ 5-Fwd                                               | AAAGAAAGCAGACCCAACGA       |
| TCR-V $\alpha$ 68-Fwd                                              | AACCCCATGGTTCAAGGATT       |
| TCR-Ja28-Rev                                                       | TCCCAAAGTGAGCTGGTAAC       |
| TCR-Ja53-Rev                                                       | CCAAATGTCAGTTTGTAGCTGG     |
| TCR-Ja10-Rev                                                       | CAAAGACAAGGTTGTAGCCTGTT    |
| TCR-Ja28-Fwd                                                       | GTACCAAACCTCTCAGTCATAACCGA |
| TCR-Ja53-Fwd                                                       | CAGGAAGTACCAGCTACAAACTGAC  |
| TCR-Ja10-Fwd                                                       | GGGACAGGAACAAGACTGCT       |
| TCR-C $\alpha$ -Rev                                                | GCTCTGGGACACATTGGTTT       |

SUPPLEMENTARY DATA

**Supplementary Table 2.** This complete listing of all TCR-V $\beta$ 13 CDR3-J $\beta$  sequences and frequencies is being provided at the request of the reviewer.

| <b>TCR-V<math>\beta</math>13 Spleen Untreated (N=127 sequences)</b> |                  |
|---------------------------------------------------------------------|------------------|
| <b>CDR3-J<math>\beta</math> Sequence</b>                            | <b>Frequency</b> |
| CASSLGGLTDKIYFGSGTRLTVL                                             | 7.1%             |
| CASQTGGVSYEQYFGPGTKLTVL                                             | 3.9%             |
| CASRGTGEVFFGKGTRLTVV                                                | 2.4%             |
| CASSLGGESYEQYFGPGTKLTVL                                             | 2.4%             |
| CASSLETGALSIAEQFFGSGTRLTVL                                          | 2.4%             |
| CASSLDQNTLFFGAGTRLSVL                                               | 1.6%             |
| CASSLSDWGGQNTLFFGAGTRLSVL                                           | 1.6%             |
| CASFQGPQLYFGEGSKLTVL                                                | 1.6%             |
| CASSLGTGAGNVLYFGEGSRLLVV                                            | 1.6%             |
| CASSRTGFNERLFFGHGTKLSVL                                             | 1.6%             |
| CASSRTGFNERLFFGHGTKLSVL                                             | 1.6%             |
| CASTWDNNERLFFGHGTKLSVL                                              | 1.6%             |
| CASSLAGSSNTEVFFGKGTRLTVV                                            | 1.6%             |
| CASSLGLLNTEVFFGKGTRLTVV                                             | 1.6%             |
| CASSPSGGEVFFGKGTRLTVV                                               | 1.6%             |
| CASRQTGGVSYEQYFGPGTKLTVL                                            | 1.6%             |
| CASSLGTGSSYEQYFGPGTKLTVL                                            | 1.6%             |
| CASSPFLNQETQYFGPGTRLLVL                                             | 1.6%             |
| CASSLSLGGASDKIYFGSGTRLTVL                                           | 1.6%             |
| CASLKQGNTLFFGAGTRLSVL                                               | 0.8%             |
| CASSFGWGGVYDTLFFGAGTRLSVL                                           | 0.8%             |
| CASSLASQNTLFFGAGTRLSVL                                              | 0.8%             |
| CASSLKQGNTLFFGAGTRLSVL                                              | 0.8%             |
| CASSPTGQNTLFFGAGTRLSVL                                              | 0.8%             |
| CASSSSQNTLFFGAGTRLSVL                                               | 0.8%             |
| CASRAGTHTGQLYFGEGSKLTVL                                             | 0.8%             |
| CASSFQGPQLYFGEGSKLTVL                                               | 0.8%             |
| CASSPETGGSNTGQLYFGEGSKLTVL                                          | 0.8%             |
| CASLTGPSGNVLYFGEGSRLLVV                                             | 0.8%             |
| CASRPTGESGNVLYFGEGSRLLVV                                            | 0.8%             |
| CASSLGQISGNVLYFGEGSRLLVV                                            | 0.8%             |
| CASSLHNSGNVLYFGEGSRLLVV                                             | 0.8%             |
| CASSPGQGGNVLYFGEGSRLLVV                                             | 0.8%             |
| CASSSTPSGNVLYFGEGSRLLVV                                             | 0.8%             |
| CASSRDRGNQAQYFGEGTRLSVL                                             | 0.8%             |
| CASRTNTGQGERLFFGHGTKLSVL                                            | 0.8%             |
| CASSFGNSNERLFFGHGTKLSVL                                             | 0.8%             |
| CASSLEGAINERLFFGHGTKLSVL                                            | 0.8%             |
| CASSLPGPNERLFFGHGTKLSVL                                             | 0.8%             |
| CASSPDRGRYERLFFGHGTKLSVL                                            | 0.8%             |
| CASSPGTNERLFFGHGTKLSVL                                              | 0.8%             |
| CASSPGAGGNERLFFGHGTKLSVL                                            | 0.8%             |

SUPPLEMENTARY DATA

|                          |      |
|--------------------------|------|
| CASSPRGWSERLFFGHGTKLSVL  | 0.8% |
| CASSRDALNERLFFGHGTKLSVL  | 0.8% |
| CASSSGTVNERLFFGHGTKLSVL  | 0.8% |
| CASSSGVSNERLFFGHGTKLSVL  | 0.8% |
| CASSSNERLFFGHGTKLSVL     | 0.8% |
| CASSSWGDERLFFGHGTKLSVL   | 0.8% |
| CASSFGPANTEVFFGKGTRLTVV  | 0.8% |
| CASSFGETEVFFGKGTRLTVV    | 0.8% |
| CASSFWGKDTEVFFGKGTRLTVV  | 0.8% |
| CASSGTGDTEVFFGKGTRLTVV   | 0.8% |
| CASSLAQGDTEVFFGKGTRLTVV  | 0.8% |
| CASSLDTNTEVFFGKGTRLTVV   | 0.8% |
| CASSLQGNTEVFFGKGTRLTVV   | 0.8% |
| CASSLTEINTEVFFGKGTRLTVV  | 0.8% |
| CASSPQGYTEVFFGKGTRLTVV   | 0.8% |
| CASSRDRGDTEVFFGKGTRLTVV  | 0.8% |
| CASSSSAGEGTEVFFGKGTRLTVV | 0.8% |
| CASTGNTEVFFGKGTRLTVV     | 0.8% |
| CASSLDWGVSYEQYFGPGTKLTVL | 0.8% |
| CASSLEDVYEQYFGPGTKLTAL   | 0.8% |
| CASSLLDGSYEQYFGPGTKLTVL  | 0.8% |
| CASSPLLGGSYEQYFGPGTKLTVL | 0.8% |
| CASSRDSSYEQYFGPGTKLTVL   | 0.8% |
| CASSRQLVSYEQYFGPGTKLTVL  | 0.8% |
| CASSRTGNEQYFGPGTKLTVL    | 0.8% |
| CASSSGDSYEQYFGPGTKLTVL   | 0.8% |
| CASSSGQGLYEQYFGPGTKLTVL  | 0.8% |
| CASSXXYEQYFGPGTKLTVX     | 0.8% |
| CASVPEAYEQYFGPGTKLTVL    | 0.8% |
| CASXSGXGAYEXYFGPGTKLTVL  | 0.8% |
| CASIDREETQYFGPGTRLLVL    | 0.8% |
| CASRGTGMYDYTFGPGTRLLVI   | 0.8% |
| CASRKDRVQETQYFGPGTRLLVL  | 0.8% |
| CASSFTLNYDYTFGPGTRLLVI   | 0.8% |
| CASSLGQGLNYDYTFGPGTRLLVI | 0.8% |
| CASSLLGGAQETQYFGPGTRLLVL | 0.8% |
| CASSLPGADQETQYFGPGTRLLVL | 0.8% |
| CASSLTQETQYFGPGTRLLVL    | 0.8% |
| CASSSGTEETQYFGPGTRLLVL   | 0.8% |
| CASSSGTEETQYFGPGTRLLVL   | 0.8% |
| CASSLXQITERLFFGQSKLSVL   | 0.8% |
| CASKEGNAEQFFGSGTRLTVL    | 0.8% |
| CASRSGTYTDKIYFGSGTRLTVL  | 0.8% |
| CASSADWGGADEQFFGSGTRLTVL | 0.8% |
| CASSFNWGGKIYFGSGTRLTVL   | 0.8% |
| CASSLGQVYAEQFFGSGTRLTVL  | 0.8% |
| CASSLIGTDKIYFGSGTRLTVL   | 0.8% |

SUPPLEMENTARY DATA

|                                                               |                  |
|---------------------------------------------------------------|------------------|
| CASSPGTGGDTDKIYFGSGTRLTVL                                     | 0.8%             |
| CASSQTGVAEQFFFGSGTRLTVL                                       | 0.8%             |
| CASSRDWGVSYAEQFFFGSGTRLTVL                                    | 0.8%             |
| CASSSGTSSYAEQFFFGSGTRLTVL                                     | 0.8%             |
| CASSSTGTDKIYFGSGTRLTVL                                        | 0.8%             |
| CASSRTGGSYAEQFFFGSGTRPTVL                                     | 0.8%             |
|                                                               |                  |
| <b>TCR-V<math>\beta</math>13 Islet-Day 4 (N=64 sequences)</b> |                  |
| <b>CDR3-J<math>\beta</math> Sequence</b>                      | <b>Frequency</b> |
| CASIRTGGLKYFGPGTKLTVL                                         | 3.1%             |
| CASSLDSSYEQYFGPGTKLTVL                                        | 3.1%             |
| CASSLDWGGREYFGPGTKLTVL                                        | 3.1%             |
| CASSLVWGGQNTLFFGAGTRLSVL                                      | 3.1%             |
| CASSNWTGGGYEQYFGPGTKLTVL                                      | 3.1%             |
| CASSPQGADKIYFGSGTRLTVL                                        | 3.1%             |
| CASSRDISYEQYFGPGTKLTVL                                        | 3.1%             |
| CASRARDGYEQYFGPGTKLTVL                                        | 1.6%             |
| CASRHGLGGNAEQFFFGSGTRLTVL                                     | 1.6%             |
| CASRSGGNTEVFFGKGTRLTVV                                        | 1.6%             |
| CASSAPGRSDKIYFGSRTRLTVL                                       | 1.6%             |
| CASSFWGKAEQFFFGSGTRLTVL                                       | 1.6%             |
| CASSGQNTLFFGAGTRLSVL                                          | 1.6%             |
| CASSGTEVFFGKGTRLTVV                                           | 1.6%             |
| CASSKDWGGNSYAEQFFFGSGTRLTVL                                   | 1.6%             |
| CASSKGQGAPNERLFFGHGTKLSVL                                     | 1.6%             |
| CASSLAGRGETDKIYFGSGTRLTVL                                     | 1.6%             |
| CASSLARGLSLYEQYFGPGTKLTVL                                     | 1.6%             |
| CASSLARGQTRYILAQEPDPSRIKRLHPRS                                | 1.6%             |
| CASSLDRANTEVFFGKGTRLTVV                                       | 1.6%             |
| CASSLDWGVNTLFFGAGTRLSVL                                       | 1.6%             |
| CASSLEGVDNEILFFGHGTKLSVL                                      | 1.6%             |
| CASSLFARGQETQYFGPGTRRLVL                                      | 1.6%             |
| CASSLGAEQFFFGSGTRLTVL                                         | 1.6%             |
| CASSLGDWGGREYFGPGTKLTVL                                       | 1.6%             |
| CASSLGFNERLFFGHGTKLSVL                                        | 1.6%             |
| CASSLGGLSNERLFFGHGTKLSVL                                      | 1.6%             |
| CASSLGGPYEQYFGPGTKLTVL                                        | 1.6%             |
| CASSLGGQYEQYFGPGTKLTVL                                        | 1.6%             |
| CASSLGRDWGGRYAEQFFFGSGTRLKVL                                  | 1.6%             |
| CASSLGIRNSPLYFAAGTRLTVT                                       | 1.6%             |
| CASSLGLGGVQNTLFFGAGTRLSVL                                     | 1.6%             |
| CASSLGQGRAEQFFFGSGTRLTVL                                      | 1.6%             |
| CASSLGTLNERLFFGHGTKLSVL                                       | 1.6%             |
| CASSLIGEERLFFGHGTKLSVL                                        | 1.6%             |
| CASSLQGAYDYTFGPGTRLLVI                                        | 1.6%             |
| CASSLTGDYAEQFFFGSGTRLTVL                                      | 1.6%             |
| CASSLTGRDWGSYEQYFGPGTKLTVL                                    | 1.6%             |

SUPPLEMENTARY DATA

|                                                                        |                  |
|------------------------------------------------------------------------|------------------|
| CASSLVGDTEVFFGKGTRLTVV                                                 | 1.6%             |
| CASSPDRDGNVLYFGEGSRLLVV                                                | 1.6%             |
| CASSPGHNSPLYFAAGTRLTVT                                                 | 1.6%             |
| CASSPGQSGNVLYFGEGSRLLVV                                                | 1.6%             |
| CASSPGTGGQAQYFGEGTRLSVL                                                | 1.6%             |
| CASSPSSTGQLYFGEGSKLTVL                                                 | 1.6%             |
| CASSQTGRDTGQLYFGEGSKLTVL                                               | 1.6%             |
| CASSRDSTGQLYFGEGSKLTVL                                                 | 1.6%             |
| CASSRDWGGRGDKIYFGSGTRLTVL                                              | 1.6%             |
| CASSRRGGDTGQLYFGEGSKLTVL                                               | 1.6%             |
| CASSRTGPWAEQFFGSGTRLTVL                                                | 1.6%             |
| CASSSDSERLFFGHGTKLSVL                                                  | 1.6%             |
| CASSESYAEQFFGSGTRLTVL                                                  | 1.6%             |
| CASSSGAGGSYAEQFFGSGTRLTVL                                              | 1.6%             |
| CASSSGSSSYEQYFGPGTKLTVL                                                | 1.6%             |
| CASSSTGYAEQFFGSGTRLTVL                                                 | 1.6%             |
| CASSWAGGAYEQYFSPGTKLTVL                                                | 1.6%             |
| CASSWDRENTLFFGAGTRLSVL                                                 | 1.6%             |
| CASSXGGGGDKIYFGSGTRLTVL                                                | 1.6%             |
|                                                                        |                  |
| <b>TCR-V<math>\beta</math>13 Islet-Day 5 (Expt 1) (N=74 sequences)</b> |                  |
| <b>CDR3-J<math>\beta</math> Sequence</b>                               | <b>Frequency</b> |
| CASSRAGSGNVLYFGEGSRLLVV                                                | 25.0%            |
| CASSERDVQETQYFGPGTRLVL                                                 | 15.6%            |
| CASSWTGGDTLLFGAGTRLSVL                                                 | 10.9%            |
| CASSFGTGGTDKIYFGSGTRLTVL                                               | 9.4%             |
| CASSQDKGGQLYFGEGSKLTVL                                                 | 7.8%             |
| CASSWTGGDTLFFGAGTRLSVL                                                 | 6.3%             |
| CASSLEXSGNVLYFGEGSRLLVV                                                | 6.3%             |
| CASSFPGNTEVFFGKGTRLTVV                                                 | 3.1%             |
| CASSFGTGYEQYFGPGTKLTVL                                                 | 3.1%             |
| CASSSTGGTDKIYFGSGTRLTVL                                                | 3.1%             |
| CASSSTGGDAEQFFGSGTRLTVL                                                | 3.1%             |
| CASSWTGGDTLFFXASTLLSVL                                                 | 1.6%             |
| CASSRDREAQYFGEGARLSVL                                                  | 1.6%             |
| CASSRDREAQYFGEGTRLSVL                                                  | 1.6%             |
| CASSSTGGRHXIFFGCTLMTVL                                                 | 1.6%             |
|                                                                        |                  |
| <b>TCR-V<math>\beta</math>13 Islet-Day 5 (Expt 2) (N=71 sequences)</b> |                  |
| <b>CDR3-J<math>\beta</math> Sequence</b>                               | <b>Frequency</b> |
| CASSRDRVSGNVLYFGEGSRLLVV                                               | 22.5%            |
| CASSPDRDERLFFGHGTKLSVL                                                 | 11.3%            |
| CASSLDQNTLFFGAGTRLSVL                                                  | 8.5%             |
| CASSRQGERLFFGHGTKLSVL                                                  | 5.6%             |
| CASSWDRAFSNERLFFGHGTKLSVL                                              | 5.6%             |
| CASSRAGSGNVLYFGEGSRLLVV                                                | 4.2%             |
| CASSQLDKNQAQYFGEGTRLSVL                                                | 4.2%             |

SUPPLEMENTARY DATA

|                                                               |                  |
|---------------------------------------------------------------|------------------|
| CASSPTISNERLFFGHGKLSVL                                        | 4.2%             |
| CASSFAQNTEVFFGKGTRLTVV                                        | 4.2%             |
| CASSLGGARTGQLYFGEGSKLTVL                                      | 2.8%             |
| CASSLGTGAGNVLYFGEGSRLLVV                                      | 2.8%             |
| CASSLGTGAGNVLYFGEGSRLLVV                                      | 2.8%             |
| CASSPRDRDQAQYFGEGTRLSVL                                       | 2.8%             |
| CASSLGTGAGNVLYFGERSRLLVV                                      | 2.8%             |
| CASSLEGTSSYEQYFGPGTKLTVL                                      | 2.8%             |
| CASSPDWGGRGNTGQLYFGEGSKLTVL                                   | 1.4%             |
| CASSPRDRDQAQYFGEGTWLSVL                                       | 1.4%             |
| CASSLRPHMGVFFGKGTRLTVV                                        | 1.4%             |
| CASSLTGTEVFFGKGTRLTVV                                         | 1.4%             |
| CASSSDRVDTEVFFGKGTRLTVV                                       | 1.4%             |
| CASSFGGRSYEQYFGPGTKLTVL                                       | 1.4%             |
| CASKEGNAEQFFGSGTRLTVL                                         | 1.4%             |
| CASSLGQVYAEQFFGSGTRLTVL                                       | 1.4%             |
| CASSLSGRYAEQFFGSGTRLTVL                                       | 1.4%             |
|                                                               |                  |
| <b>TCR-V<math>\beta</math>13 Islet-Day 7 (N=66 sequences)</b> |                  |
| <b>CDR3-J<math>\beta</math> Sequence</b>                      | <b>Frequency</b> |
| CASSFAGGYEQYFGPGTKLTVL                                        | 43.9%            |
| CASSERGNVDYTFGPGTRLLVI                                        | 6.1%             |
| CASSSGRYNSPLYFAAGTRLTVT                                       | 3.0%             |
| CASSQGGFGNVLYFGEGSRLLVV                                       | 3.0%             |
| CASSSGTGWERLFFGHGKLSVL                                        | 3.0%             |
| CASSRDSSYEQYFGPGTKLTVL                                        | 3.0%             |
| CASSSGGASYAEQFFGSGTRLTVL                                      | 3.0%             |
| CASSLGGRNDLFFGAGTQLSVL                                        | 1.5%             |
| CASSLAGNTLFFGAGTRLSVL                                         | 1.5%             |
| CASSLAPGEDTLFFGAGTRLSVL                                       | 1.5%             |
| CASSSTGGGEVTLFFGAGTRLSVL                                      | 1.5%             |
| CASSEGAGNSPLYFAAGTRLTVT                                       | 1.5%             |
| CASKGGNTGQLYFGEGSKLTVL                                        | 1.5%             |
| CASSFEQGGISNERLFFGHGKLSVL                                     | 1.5%             |
| CASSLSQDRAPERLFFGHGKLSVL                                      | 1.5%             |
| CASSLRASTEVFFGKGRTLTVV                                        | 1.5%             |
| CASSFSGLTNTEVFFGKGTRLTVV                                      | 1.5%             |
| CASSRGPTEVFFGKGTRLTVV                                         | 1.5%             |
| CASSFAGGYEQYFGTGTKLTVL                                        | 1.5%             |
| CASASGGTYEQYFGPGTKLTVL                                        | 1.5%             |
| CASRLLGGLDXDYFPGTKLTDQ                                        | 1.5%             |
| CASSLGARTEVFFGPGTRLTVV                                        | 1.5%             |
| CASSLAGGVNQETQYFGPGTRLLVL                                     | 1.5%             |
| CASSLGLGGETQYFGPGTRLLVL                                       | 1.5%             |
| CASSLWDWGGEETQYFGPGTRLLVL                                     | 1.5%             |
| CASRSGGGQETQYFGPGTRLLVL                                       | 1.5%             |
| CASSSTPNQETQYFGPGTRLLVL                                       | 1.5%             |

SUPPLEMENTARY DATA

|                                                                           |                  |
|---------------------------------------------------------------------------|------------------|
| CASSLAGGYEQXFGSGTKLTVL                                                    | 1.5%             |
| CASSLGGGADKIYFGSGTRLTVL                                                   | 1.5%             |
| CASSSGDWGTDKIYFGSGTRLTVL                                                  | 1.5%             |
|                                                                           |                  |
| <b>TCR-V<math>\beta</math>13 Cultured Islet T-Cells (N=117 sequences)</b> |                  |
| <b>CDR3-J<math>\beta</math> Sequence</b>                                  | <b>Frequency</b> |
| CASSFAGGVYEQYFGPGTKLTVL                                                   | 50.4%            |
| CASSLGLGGETQYFGPGTRLLVL                                                   | 18.8%            |
| CASSLEGGERLFFGHGTKLSVL                                                    | 5.1%             |
| CASRAGLGGDYEQYFGPGTKLTVL                                                  | 3.4%             |
| CASSLWTGDGNTEVFFGKGTRLTVV                                                 | 2.6%             |
| CASREAGTGSDKIYFGSGTRLTVL                                                  | 2.6%             |
| CASSRTGGYAEQFFGSGTRLTVL                                                   | 2.6%             |
| CASSFRGGRENTLFFGAGTRLSVL                                                  | 1.7%             |
| CASSFYLGLSNERLFFGHGTKLSVL                                                 | 1.7%             |
| CASSPRLGGALAEQFFGSGTRLTVL                                                 | 1.7%             |
| CASSPRGGGAIQNTLFFGAGTRLSVL                                                | 0.9%             |
| CASSQGDQNTLFFGAGTRLSVL                                                    | 0.9%             |
| CASSLGTGAGNVLYFGEGSRLLVV                                                  | 0.9%             |
| CASSFRGSNERLFFGHGTKLSVL                                                   | 0.9%             |
| CASSFYLGLXNERMFFGHGTKLSVL                                                 | 0.9%             |
| CASSSGTGGPNERLFFGHGTKLSVL                                                 | 0.9%             |
| CASSFAVGVYNQYFGPGTHLLVL                                                   | 0.9%             |
| CASSLAGGVYEQYFGPGTKLTVL                                                   | 0.9%             |
| CASSLFGGTSYEQYFGPGTKLTVL                                                  | 0.9%             |
| CASSLGGGGETQYFGPGTRLLVL                                                   | 0.9%             |
| CASSPSGKETQYFGPGTRLLVL                                                    | 0.9%             |

SUPPLEMENTARY DATA

**Supplementary Table 3.** This complete listing of all TCR-V $\alpha$ 5 CDR3-J $\alpha$  sequences and frequencies is being provided at the request of the reviewer.

| <b>TCR-V<math>\alpha</math>5 Spleen Untreated (N=62 sequences)</b> |                  |
|--------------------------------------------------------------------|------------------|
| <b>CDR3-J<math>\alpha</math> Sequence</b>                          | <b>Frequency</b> |
| CAASDNSNYQLIWGSGTKLIIKPD                                           | 3.9%             |
| CAASRGNNNAPRFGAGTRLTVKPN                                           | 2.6%             |
| CAATPYNSNAGKLTFGDGTRLTVKPN                                         | 2.6%             |
| CAASEGGGSFAKPTFGKGTKLSVKS                                          | 2.6%             |
| CAAKGYNQGKLIFGQGTKLSIKPN                                           | 2.6%             |
| CANRAGNRLTFGRGTRVLIRPD                                             | 2.6%             |
| CAASNNNAPRFGAGTRLTVKPN                                             | 1.3%             |
| CAARAHNNNAPRFGAGTRLTVKPN                                           | 1.3%             |
| CAASAGNNNAPRFGAGTRLTVKPN                                           | 1.3%             |
| CAARANNNNAPRFGAGTRLTVKPN                                           | 1.3%             |
| CAASAGNNAPRFGAGTRLTVKPN                                            | 1.3%             |
| CAASRHTGNKYVFGAGTRLKVIPH                                           | 1.3%             |
| CAARYNNNAPRFGAGTRLTVKPN                                            | 1.3%             |
| CAASASNNNNRLFFGDGTQLVVKPN                                          | 1.3%             |
| CAPRGNRLSFGDGTQLVVKPN                                              | 1.3%             |
| CAASNSNAGKLTFGDGTRLTVKPN                                           | 1.3%             |
| CAASPNSNAGKLTFGDGTRLTVKPN                                          | 1.3%             |
| CAASAGGGSQKLIFGEGTKLTVSLY                                          | 1.3%             |
| CAASGVAGGLSGKLTFGEGTQVTVISD                                        | 1.3%             |
| CAASAGSALGKLYFGIGTQLTVTPD                                          | 1.3%             |
| CTASIRGSALGKLYFGIGTQLTVTPD                                         | 1.3%             |
| CTARPHRGSALGKLYFGIGTQLTVTPD                                        | 1.3%             |
| CTASRGSALGKLYFGIGTQLTVTPD                                          | 1.3%             |
| CAASNANKVIFGKGTRLHVLPN                                             | 1.3%             |
| CAASAGTGSYQLTFGKGTKLSVIPN                                          | 1.3%             |
| CAASEGSGGSFAKPTFGKGTKLSVKS                                         | 1.3%             |
| CAASGGGSFAKPTFGKGTKLSVKS                                           | 1.3%             |
| CAAGGSFAKPTFGKGTKLSVKS                                             | 1.3%             |
| CAAVGAGSTSYKLTFGKGTLTVNPN                                          | 1.3%             |
| CAAINSGGSFAKPTFGKGTKLSVKS                                          | 1.3%             |
| CAAPPGTGSYQLTFGKGTKLSVIPN                                          | 1.3%             |
| CAASRESGRTLIFGKGTLVLPSPN                                           | 1.3%             |
| CAAVSGGSFAKPTFGKGTKLSVKS                                           | 1.3%             |
| CAAGTGSTSYKLTFGKGTLTVNPN                                           | 1.3%             |
| CAASVRDGANNKLTFGKGTTLSVIPD                                         | 1.3%             |
| CAASGKGNTGKLIFGLGTTLQVQPD                                          | 1.3%             |
| CTASNDVGVNSKLIWGLGTS LAVNPN                                        | 1.3%             |
| CAALTAMQANPLGMGPGSQSQMS                                            | 1.3%             |



SUPPLEMENTARY DATA

|                                                                           |                  |
|---------------------------------------------------------------------------|------------------|
| CTASITGFGSALKFGPGTKVIVIPY                                                 | 1.3%             |
| CAATSSNSKLVFGQGTSLVIPN                                                    | 1.3%             |
| CAANRAGNRLTFGRGTRVLIRPD                                                   | 1.3%             |
| CTASEFYDKLYFGSGTKLIVKPN                                                   | 1.3%             |
| CAAIESGGYKLVFGSGTRLLVSAD                                                  | 1.3%             |
| CTARGQVVGQLTFGSGTRLQVYAN                                                  | 1.3%             |
| CTASISSGNWQLVFGSGTQLTVLPD                                                 | 1.3%             |
| CTAVRGGGYKLVFGSGTRLLVSAD                                                  | 1.3%             |
| CAASAGGSANXLIFGTGTLISVKPN                                                 | 1.3%             |
| CAAPGDSGTYSFSGTGKLSVIPN                                                   | 1.3%             |
| CAARGSSGTDKVIFGTGTRLQVSPN                                                 | 1.3%             |
| CTASIGTGFGKLFQGTGTQVVVTPD                                                 | 1.3%             |
| CTASKSGTYQSFSGTGKLSVIPN                                                   | 1.3%             |
| CTASPSSGTDKVIFGTGTRLQVSPN                                                 | 1.3%             |
| CAARSYGGSGNKLIFGTGTLISVKPN                                                | 1.3%             |
| CAARSGTDKVIFGTGTRLQVSPN                                                   | 1.3%             |
| CAASSGTDKVIFGTGTRLQVSPN                                                   | 1.3%             |
|                                                                           |                  |
| <b>TCR-V<math>\alpha</math>5 islet Day 5 (N=24 sequences)</b>             |                  |
| <b>CDR3-J<math>\alpha</math> Sequence</b>                                 | <b>Frequency</b> |
| CAASLYGNEKMTFGAGTRLTIKPN                                                  | 45.8%            |
| CAAGNSNAGKLTFGDGTRLTVKPN                                                  | 29.2%            |
| CAASPGGNYKLTFGKGTSLVVHPH                                                  | 8.3%             |
| CAASAWSSGGSFAKPTFGKGTKLSVKS                                               | 8.3%             |
| CAASATGTDKVIFGTGTRLQVSPN                                                  | 4.2%             |
| CAASNISSGNWQLVFGSGTQLTVLPD                                                | 4.2%             |
|                                                                           |                  |
| <b>TCR-V<math>\alpha</math>5 Cultured Islet T-Cells (N=113 sequences)</b> |                  |
| <b>CDR3-J<math>\alpha</math> Sequence</b>                                 | <b>Frequency</b> |
| CAASPGTGSYQLTFGKGTKLSVIPN                                                 | 59.3%            |
| CAASSYGANNKLTFGKGTTLVIPD                                                  | 14.2%            |
| CAASALRGSGNKLIFGTGTLISVKPN                                                | 9.7%             |
| CAASAGDSGTYSFSGTGKLSVIPN                                                  | 4.4%             |
| CAASPGTGSYQLTFGKD                                                         | 3.5%             |
| CAVESSGNWQLVFGSGTQLTVLPD                                                  | 2.7%             |
| CAGQGGSQKLIFGEGTKLTVSLY                                                   | 1.8%             |
| CAASALHGNEKMTFGAGTRLTIKPN                                                 | 0.9%             |
| CAGQGGXQKLIFGEGTKLTVSLY                                                   | 0.9%             |
| CAASSYGANNKLTFGEGTTLVIPD                                                  | 0.9%             |
| CAASALRGSGNKLIFGTGTLISVKPN                                                | 0.9%             |
| CAAVTTTGFGKLFQGTGTQVVVTPD                                                 | 0.9%             |

SUPPLEMENTARY DATA

**Supplementary Figure 1.** V $\beta$ 13+ T-cells in the islets of diabetes resistant rats. We analyzed the abundance of V $\beta$ 13+ transcripts in the islets of LEW.1WR1, LEW.1W and WF rats to determine if we could compare the clonality of V $\beta$ 13+ transcripts between susceptible and resistant rats at a given time. While V $\beta$ 13+ transcripts increase significantly in LEW.1WR1 islets on day 7, the abundance in resistant islets is not above the baseline level of untreated samples. Of interest, this is a slight elevation of V $\beta$ 13+ transcripts between day 9 and 11 in the LEW.1W rat. This delayed accumulation of potentially diabetogenic T-cells corresponds to the later onset of diabetes in a limited subset of LEW.1W rats.

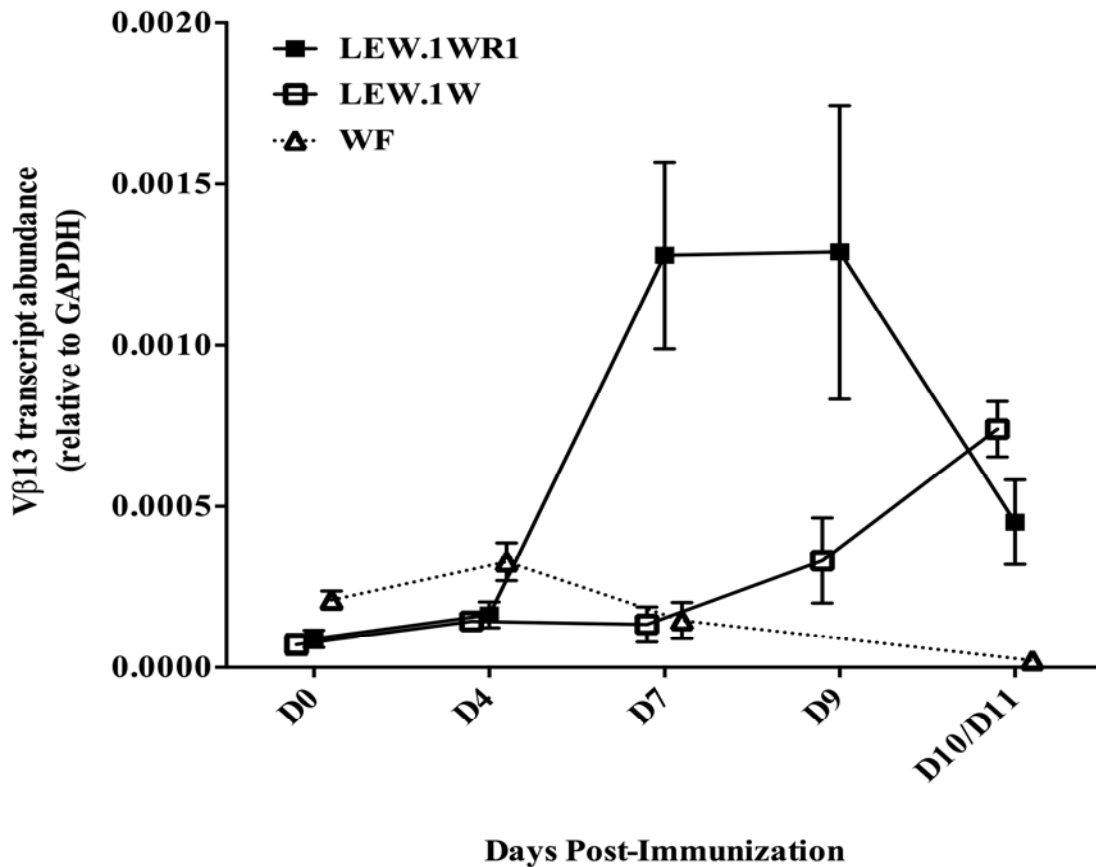

SUPPLEMENTARY DATA

**Supplementary Figure 2.** TCR-V $\alpha$ 5 paralogs: novel identification and alignments A. Amino acid sequences from mouse TCR-V $\alpha$ 5D4\*04 and the four rat TCR-V $\alpha$ 5 paralogs identified in the rat reference sequence with cDNA clones (Clone 1-4) from our experiments. Clones 1 and 2 are novel sequences and differ from the reference sequences at the residues indicated in bold to the left of CDR1. Interestingly, the CDR2 nucleotide sequence of TCR-V $\alpha$ 5-2 differs from the other paralogs at a single base but retains the same amino acid sequence indicating a concerted evolutionary selection to retain this particular CDR2 peptide sequence B. Branch-length dendrogram display of rat sequences in A. Clones 1 and 2 are likely to be novel paralogous variants derived from TCR-V $\alpha$ 5-4 and TCR-V $\alpha$ 5-1 (or 5-3) respectively with the difference of a single nucleotide polymorphism. This identification of two novel paralogs suggests there may be an additional TCR $\alpha$  locus duplication adding further complexity to our understanding of TCR genetics.

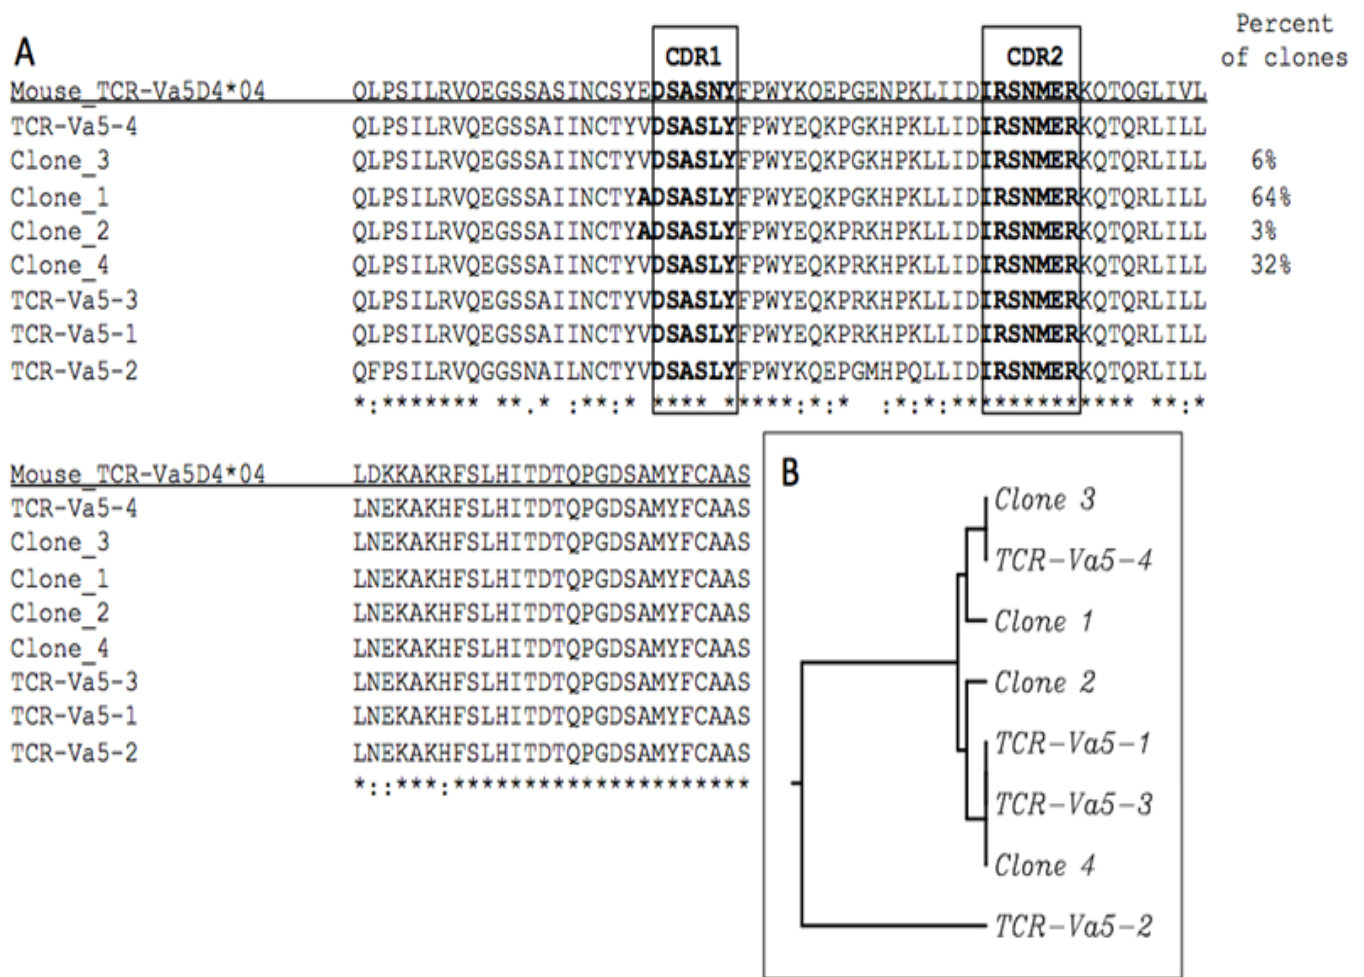

SUPPLEMENTARY DATA

**Supplementary Figure 3.** TCR-V $\alpha$ 5+ Transcripts have a tight temporal accumulation in the LEW.1WR1 pre-diabetic islet. TCR-V $\alpha$ 5+ Transcripts from LEW.1WR1 islets were analyzed by qRT-PCR analysis and normalized to TCR-C $\alpha$  to determine the percent of V $\alpha$ 5+ T-cells. There is a trend toward V $\alpha$ 5+ transcript accumulation by day 6 in the LEW.1WR1 islet but means are not significantly different. Latency is variable even among littermates so within each day (6,7,9) biological replicates may represent different staging of diabetes progression. If V $\alpha$ 5+ T-cells infiltrate the islet only briefly during initiation of diabetes this explains the high variability between animals on days 6-9. N= 3-5 rats per time point, 29 rats total.

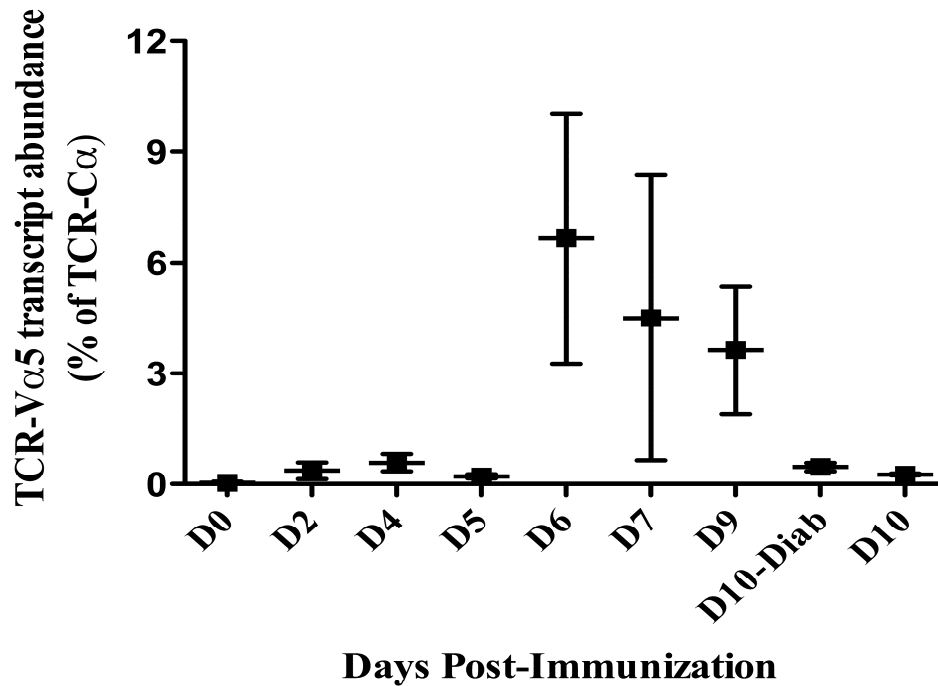

SUPPLEMENTARY DATA

**Supplementary Figure 4.** Islet specific antigen focusing of V $\alpha$ 5+ transcripts. TCR-V $\alpha$ 5+J $\alpha$ 28+ sequences represent about 60% of cultured islet T-cell transcripts analyzed above (Figure 4.B, sequence 3). To confirm the islet-specific skewing of V $\alpha$ 5-J $\alpha$ 28 transcripts we analyzed the abundance of specific CDR3-J $\alpha$  regions among V $\alpha$ 5 and V $\alpha$ 68 transcripts (V $\alpha$  forward and J $\alpha$  reverse primers) by qRT-PCR. V $\alpha$ 68 was chosen as an additional V $\alpha$  gene comparator as it was frequent on T-cells infiltrating cardiac allografts in Lewis rats and thus expected to be in low abundance in infiltrated islet (35). The abundance of each V $\alpha$ -J $\alpha$  amplicon was normalized to total J $\alpha$  abundance (J $\alpha$  forward and C $\alpha$  reverse primers). qRT-PCR of V $\alpha$ -J $\alpha$  and J $\alpha$ -C $\alpha$  transcripts was performed as described in methods and primers are listed in supplemental table 1. We confirmed a ~100 fold enrichment of V $\alpha$ 5-J $\alpha$ 28 in islet T-cells relative to the periphery. We also show that other J $\alpha$  segments were not over represented in V $\alpha$ 5 transcripts (J $\alpha$ 53 was frequent on insulin-reactive, NOD V $\alpha$ 5+ T-cells while J $\alpha$ 10 was rarely observed in our sequence analysis). Lastly, V $\alpha$ 68 joined to any J $\alpha$  analyzed was infrequent in islet or peripheral T-cells.

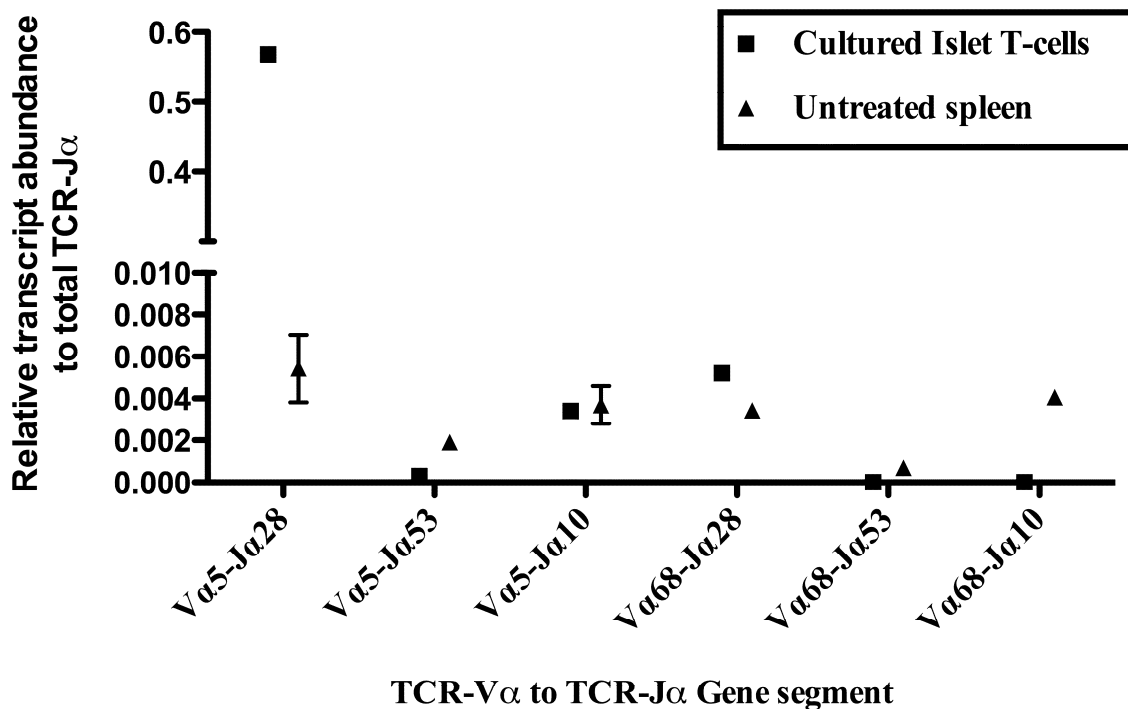

Supplement: supp_db13-0462_DB130462SupplementaryData.pdf [file supp_db13-0462_DB130462SupplementaryData.pdf]
